# Supplementary material
Source: ML conference proceedings conference paper supplement (https://openaccess.thecvf.com/content/ICCV_2017/html/Liu_3DCNN-DQN-RNN_A_Deep_ICCV_2017_paper.html)
Supplement: Supplementary file 2 [file Liu_3DCNN-DQN-RNN_A_Deep_ICCV_2017_supplemental.zip]

Archive with 2 entries (2 files):
- Eye window detecting objects.mp4
- 2931-supp.pdf
